# Supplementary material
Source: publisher figshare collection journal article supplement (https://tandf.figshare.com/ndownloader/files/12285578)
Supplement: Supplementary file 1 [file 12285578]

**Additional File 1:** Search query used for the systematic review.

| Search Queries |
| --- |
| #1 Drug  AND  #2 (adverse AND (event OR events)) OR (adverse AND (reaction OR reactions))  AND  #3 (economic AND burden) OR ((cost OR costs) AND (analysis OR analyses)) OR (health AND care AND (cost OR costs)) OR (hospital AND (costs OR cost))  AND  #4 preventable OR preventability OR avoidable OR avoidability |
